# Supplementary material
Source: Elsevier journal article supplement (https://www.sciencedirect.com/science/article/pii/S0210480620301431)
Supplement: mmc1 [file S0210480620301431:mmc1.pdf]

| Tabla suplementaria 1. Preguntas PICO |                                                                                                                                                                                                        |
|---------------------------------------|--------------------------------------------------------------------------------------------------------------------------------------------------------------------------------------------------------|
| Poblacion (Population)                | Pacientes que van a ser intervenidos de cistectomía radical (abordaje abierto, laparoscópico o robótico)                                                                                               |
| Intervención (Intervention)           | Aplicación de protocolo ERAS completo                                                                                                                                                                  |
| Comparador (Comparator)               | Comparación con grupo control (abordaje tradicional no-ERAS)                                                                                                                                           |
| Resultado (Outcomes)                  | Tiempo de estancia, tasa de reingresos, tasa de complicaciones mayores, tasa de mortalidad, tiempo a primera defecación, tiempo a tránsito gaseoso, tiempo a tolerancia normal, tasa de transfusiones. |

Tabla suplementaria 2. Método de evaluación del protocolo

| Pregunta investigadora adicional a la existencia o no del ítem en el texto. |                                      |                                                                                                                 |
|-----------------------------------------------------------------------------|--------------------------------------|-----------------------------------------------------------------------------------------------------------------|
| Item del protocolo ERAS                                                     | Requisitos para obtener "Sí"         | Requisito para obtener Sí +                                                                                     |
| <b>Educación preoperatoria</b>                                              | Inclusión del ítem nombrada en texto | ¿Se describe la entrega al paciente de información específica acerca de intervención y protocolo?               |
| <b>Optimización pre-operatoria</b>                                          | Inclusión del ítem nombrada en texto | ¿Se describe, al menos, la evaluación nutricional del paciente previa a la cirugía?                             |
| <b>Omisión preparación intestinal</b>                                       | Inclusión del ítem nombrada en texto | ¿Se especifica la ausencia de preparación intestinal por parte de los pacientes?                                |
| <b>Protocolo HBPM</b>                                                       | Inclusión del ítem nombrada en texto | ¿Se especifica la pauta terapéutica de profilaxis antitrombótica previa a la cirugía?                           |
| <b>Protocolo antibiótico</b>                                                | Inclusión del ítem nombrada en texto | ¿Se especifica el antibiótico pautado previo a la cirugía?                                                      |
| <b>Protocolo ayunas</b>                                                     | Inclusión del ítem nombrada en texto | ¿Se describe exactamente las horas de ayuno/ tipo de alimentación previa a la cirugía?                          |
| <b>Sobrecarga carbohidratos</b>                                             | Inclusión del ítem nombrada en texto | ¿Se describe el suplemento específico o la cantidad administrada utilizada previa a la cirugía?                 |
| <b>Manejo de fluidos peri-operatorios</b>                                   | Inclusión del ítem nombrada en texto | ¿Se describe específicamente el protocolo de manejo de líquidos perioperatorio?                                 |
| <b>Catéter epidural</b>                                                     | Inclusión del ítem nombrada en texto | ¿Se describe el lugar de colocación y la medicación administrada por el catéter epidural?                       |
| <b>Protocolo anestésico estandar</b>                                        | Inclusión del ítem nombrada en texto | ¿Se describe de manera detallada fármacos y pautas a seguir en las diferentes fases anestésicas?                |
| <b>Pre-medicación anestésica</b>                                            | Inclusión del ítem nombrada en texto | ¿Se describe la omisión de medicación preanestésica o el fármaco anestésico utilizado previamente a la cirugía? |
| <b>Prevención hipotermia</b>                                                | Inclusión del ítem nombrada en texto | ¿Se describe el dispositivo utilizado para la prevención de la hipotermia?                                      |
| <b>Retirada SNG tras cirugía</b>                                            | Inclusión del ítem nombrada en texto | ¿Se describe el momento de la retirada de sonda nasogátrica?                                                    |

|                                     |                                                                          |                                                                                                                |
|-------------------------------------|--------------------------------------------------------------------------|----------------------------------------------------------------------------------------------------------------|
| <b>Mobilización precoz</b>          | Inclusión del ítem nombrada en texto                                     | ¿Se describe el protocolo de movilización según horas postcirugía?                                             |
| <b>Analgesia post-operatoria</b>    | Inclusión del ítem nombrada en texto                                     | ¿Se especifican los fármacos analgésicos utilizados?                                                           |
| <b>Alimentación precoz</b>          | Inclusión del ítem nombrada en texto                                     | ¿Se especifican las horas de reintroducción de alimentos?                                                      |
| <b>Protocolo antináusea</b>         | Inclusión del ítem nombrada en texto                                     | ¿Se especifican los fármacos antieméticos utilizados?                                                          |
| <b>Omisión catéter urinario</b>     | Inclusión del ítem nombrada en texto                                     | No requisito adicional                                                                                         |
| <b>Omisión catéter abdominal</b>    | Inclusión del ítem nombrada en texto                                     | No requisito adicional                                                                                         |
| <b>Cirugía mínimamente invasiva</b> | Existencia de pacientes con abordaje laparoscópico o robótico            | ¿Se clasifica el tipo de cirugía según subgrupo ERAS/no ERAS?                                                  |
| <b>Auditoría: Adherencia</b>        | Se expresan resultados de adherencia al protocolo de alguna de las fases | ¿Se realiza estudio de la adherencia y resultados del protocolo detallado por ítem pre,intra y postoperatorio? |

| Tabla suplementaria 3. Herramienta RoB 2 para ensayos clínicos |                                                        |                                                                          |                                                   |                                                  |                                                               |                       |
|----------------------------------------------------------------|--------------------------------------------------------|--------------------------------------------------------------------------|---------------------------------------------------|--------------------------------------------------|---------------------------------------------------------------|-----------------------|
| Estudio                                                        | Riesgo de sesgo derivado del proceso de aleatorización | Riesgo de sesgo debido a las desviaciones de la intervenciones previstas | Riesgo de sesgo debido a la perdida de resultados | Riesgo de sesgo debido la medición del resultado | Riesgo de sesgo debido a la selección del resultado informado | Riesgo de sesgo total |
| Frees et al                                                    | Posibilidad de sesgo                                   | Bajo riesgo de sesgo                                                     | Posibilidad de sesgo                              | Posibilidad de sesgo                             | Posibilidad de sesgo                                          | Posibilidad de sesgo  |
| Lin et al                                                      | Posibilidad de sesgo                                   | Bajo riesgo de sesgo                                                     | Bajo riesgo de sesgo                              | Posibilidad de sesgo                             | Posibilidad de sesgo                                          | Posibilidad de sesgo  |
| Ibrahim et al                                                  | Posibilidad de sesgo                                   | Alto riesgo de sesgo                                                     | Bajo riesgo de sesgo                              | Alto riesgo de sesgo                             | Posibilidad de sesgo                                          | Alta riesgo de sesgo  |

Tabla suplementaria 4. Escala Newcastle-Ottawa para estudios no aleatorizados

|                      | Selección                                |                                     |                               |                                                                                      | Comparabilidad                                                          | Resultados               |                                               |                                            |
|----------------------|------------------------------------------|-------------------------------------|-------------------------------|--------------------------------------------------------------------------------------|-------------------------------------------------------------------------|--------------------------|-----------------------------------------------|--------------------------------------------|
|                      | Representatividad de la cohorte expuesta | Selección de la cohorte no expuesta | Verificación de la exposición | Demostración de que el resultado de interés no estaba presente al inicio del estudio | Comparabilidad de las cohortes en base al diseño o análisis del estudio | Valoración del resultado | ¿Fue el seguimiento suficientemente adecuado? | Adecuación del seguimiento de las cohortes |
| Altobelli et al      | ★                                        | ★                                   | ★                             | ★                                                                                    | --                                                                      | ★                        | -                                             | ★                                          |
| Baldini et al        | ★                                        | ★                                   | ★                             | ★                                                                                    | -★                                                                      | ★                        | -                                             | ★                                          |
| Baack Kukreja et al  | ★                                        | ★                                   | ★                             | ★                                                                                    | ★-                                                                      | ★                        | ★                                             | ★                                          |
| Casans-Frances et al | ★                                        | ★                                   | ★                             | ★                                                                                    | -★                                                                      | ★                        | -                                             | ★                                          |
| Cerruto et al        | ★                                        | ★                                   | ★                             | ★                                                                                    | -★                                                                      | ★                        | ★                                             | ★                                          |
| Collins et al        | ★                                        | ★                                   | ★                             | ★                                                                                    | -★                                                                      | ★                        | ★                                             | ★                                          |
| Dunkman et al        | ★                                        | ★                                   | ★                             | ★                                                                                    | ★-                                                                      | ★                        | -                                             | ★                                          |
| Liu et al            | ★                                        | ★                                   | ★                             | ★                                                                                    | --                                                                      | ★                        | -                                             | ★                                          |
| Llorente et al       | ★                                        | ★                                   | ★                             | ★                                                                                    | ★★                                                                      | ★                        | ★                                             | ★                                          |
| Mukhtar et al        | ★                                        | ★                                   | ★                             | ★                                                                                    | -★                                                                      | ★                        | -                                             | ★                                          |
| Ortega-Lucea et al   | ★                                        | ★                                   | ★                             | ★                                                                                    | ★★                                                                      | ★                        | -                                             | ★                                          |
| Palumbo et al        | ★                                        | ★                                   | ★                             | ★                                                                                    | -★                                                                      | ★                        | ★                                             | ★                                          |
| Pang et al           | ★                                        | ★                                   | ★                             | ★                                                                                    | --                                                                      | ★                        | ★                                             | ★                                          |
| Patel et al          | ★                                        | ★                                   | ★                             | ★                                                                                    | -★                                                                      | ★                        | -                                             | ★                                          |
| Persson et al        | ★                                        | ★                                   | ★                             | ★                                                                                    | -★                                                                      | ★                        | -                                             | ★                                          |
| Romagnoli et al      | ★                                        | ★                                   | ★                             | ★                                                                                    | ★★                                                                      | ★                        | ★                                             | ★                                          |
| Semerjian et al      | ★                                        | ★                                   | ★                             | ★                                                                                    | --                                                                      | ★                        | ★                                             | ★                                          |
| Smith et al          | ★                                        | ★                                   | ★                             | ★                                                                                    | ★★                                                                      | ★                        | ★                                             | ★                                          |
| Tan et al            | ★                                        | ★                                   | ★                             | ★                                                                                    | ★-                                                                      | ★                        | ★                                             | ★                                          |

|                  |   |   |   |   |    |   |   |   |
|------------------|---|---|---|---|----|---|---|---|
| Uña-Orejón et al | ★ | ★ | ★ | ★ | ★★ | ★ | - | ★ |
| Wei et al        | ★ | ★ | ★ | ★ | -★ | ★ | ★ | ★ |
| Zhang et al      | ★ | ★ | ★ | ★ | ★★ | ★ | ★ | ★ |

En el apartado comparabilidad se otorgó una "estrella" si el protocolo utilizado por cada grupo aparecía definido en el artículo, y una segunda "estrella" si los grupos eran comparables en cuanto a características demográficas. En el apartado seguimiento se otorgó una "estrella" si el seguimiento fue de al menos 90 días.
